# Supplementary material for: K3B4PO10and K2MB4PO10(M = Rb/Cs): rare mixed-coordinated borophosphates with large birefringence
Source: Royal Society of Chemistry journal article supplement (doi:10.1039/d0qi01354d), 2020-12-31
Supplement: d0qi01354d1.pdf [file d0qi01354d1.pdf]

## Supporting Information

### **$K_3B_4PO_{10}$ and $K_2MB_4PO_{10}$ (M = Rb/Cs): Rare Mixed-Coordinated Borophosphates with Large Birefringence**

Ying Hou,<sup>a</sup> Bingbing Zhang,<sup>b</sup> Hongping Wu,<sup>a,\*</sup> Hongwei Yu,<sup>a,\*</sup> Zhanggui Hu,<sup>a</sup> Jiyang Wang,<sup>a</sup> Yicheng Wu<sup>a</sup>

<sup>a</sup>*Tianjin Key Laboratory of Functional Crystal Materials, Institute of Functional Crystals, Tianjin University of Technology, Tianjin 300384, China.*

<sup>b</sup>*College of Chemistry and Environmental Science, Hebei University, 180 East Wusi Road, Baoding 071002, China.*

## CONTENTS

|                                                                                                                        |     |
|------------------------------------------------------------------------------------------------------------------------|-----|
| Figure S1 X-ray powder diffraction patterns of $K_3B_4PO_{10}$ , $K_2RbB_4PO_{10}$ and $K_2CsB_4PO_{10}$ .....         | S3  |
| Figure S2 Crystal structures of $K_2RbB_4PO_{10}$ and $K_2CsB_4PO_{10}$ . .....                                        | S4  |
| Figure S3 IR spectra of $K_3B_4PO_{10}$ , $K_2RbB_4PO_{10}$ and $K_2CsB_4PO_{10}$ . .....                              | S5  |
| Figure S4 UV–vis–NIR diffuse reflectance spectra of $K_3B_4PO_{10}$ , $K_2RbB_4PO_{10}$ and $K_2CsB_4PO_{10}$<br>..... | S6  |
| Figure S5 Photograph of crystal size. ....                                                                             | S7  |
| Figure S6 DSC-TG curves of $K_3B_4PO_{10}$ , $K_2RbB_4PO_{10}$ and $K_2CsB_4PO_{10}$ .....                             | S8  |
| Table S1. A summary of mixed-coordinated borophosphates .....                                                          | S9  |
| Table S2. Crystal data and structure refinement for $K_3B_4PO_{10}$ , $K_2RbB_4PO_{10}$ , and $K_2CsB_4PO_{10}$ ..     | S10 |
| Table S3. Atoms coordinates and equivalent isotropic displacement parameters for $K_3B_4PO_{10}$ ..                    | S11 |
| Table S4. Atoms coordinates and equivalent isotropic displacement parameters for $K_2RbB_4PO_{10}$<br>.....            | S12 |
| Table S5. Atoms coordinates and equivalent isotropic displacement parameters for $K_2CsB_4PO_{10}$<br>.....            | S13 |
| Table S6. Selected distances (Å) and angles (deg) for $K_3B_4PO_{10}$ .....                                            | S14 |
| Table S7. Selected distances (Å) and angles (deg) for $K_2RbB_4PO_{10}$ . .....                                        | S16 |
| Table S8. Selected distances (Å) and angles (deg) for $K_2CsB_4PO_{10}$ .....                                          | S19 |

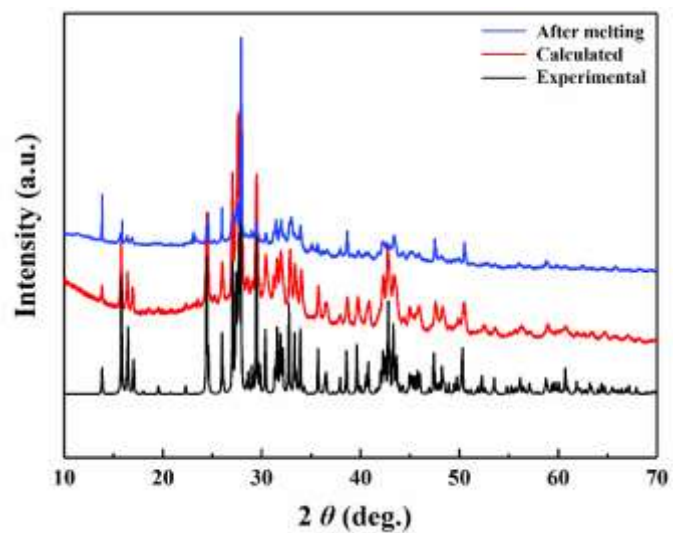

(a)

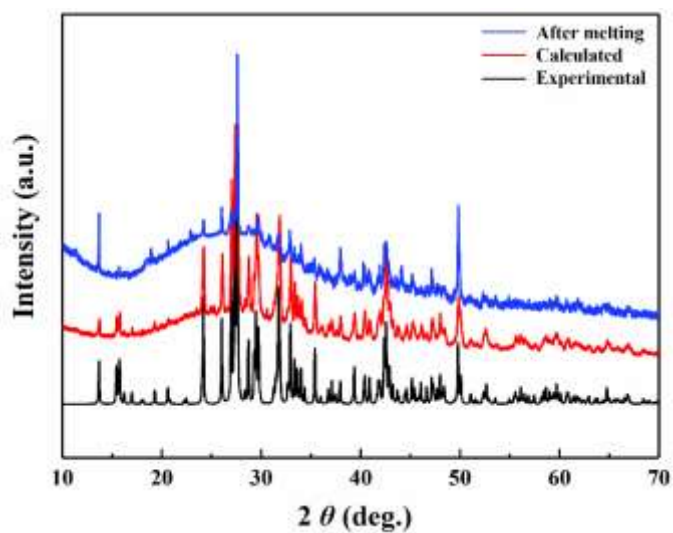

(b)

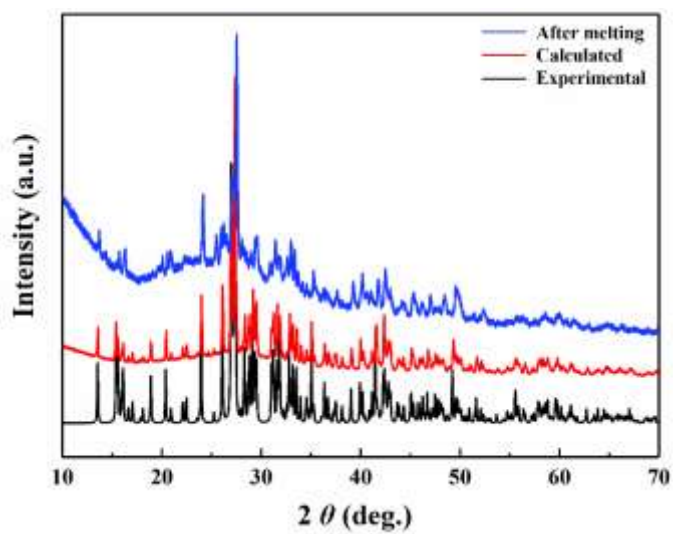

(c)

**Figure S1.** X-ray powder diffraction patterns of  $\text{K}_3\text{B}_4\text{PO}_{10}$  (a),  $\text{K}_2\text{RbB}_4\text{PO}_{10}$  (b) and  $\text{K}_2\text{CsB}_4\text{PO}_{10}$

(c)

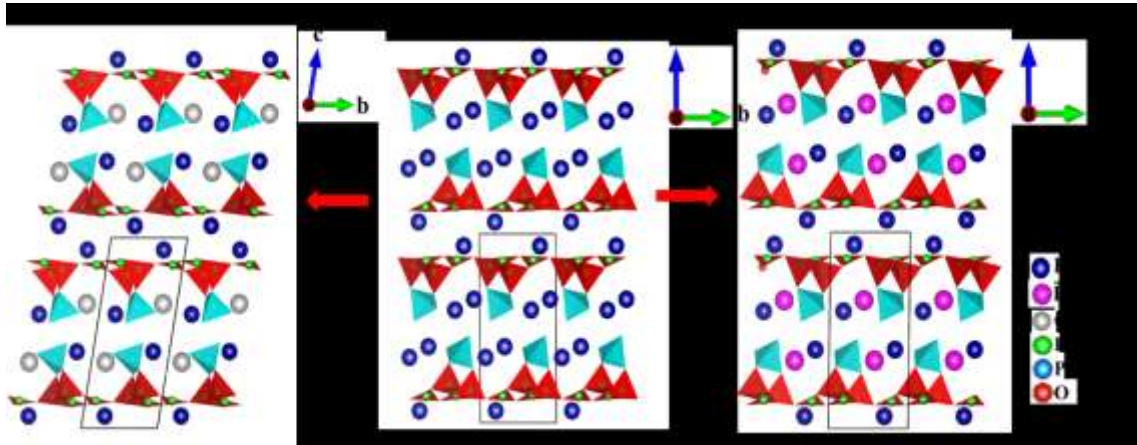

Figure S2. Crystal structures of  $K_2RbB_4PO_{10}$  and  $K_2CsB_4PO_{10}$ .

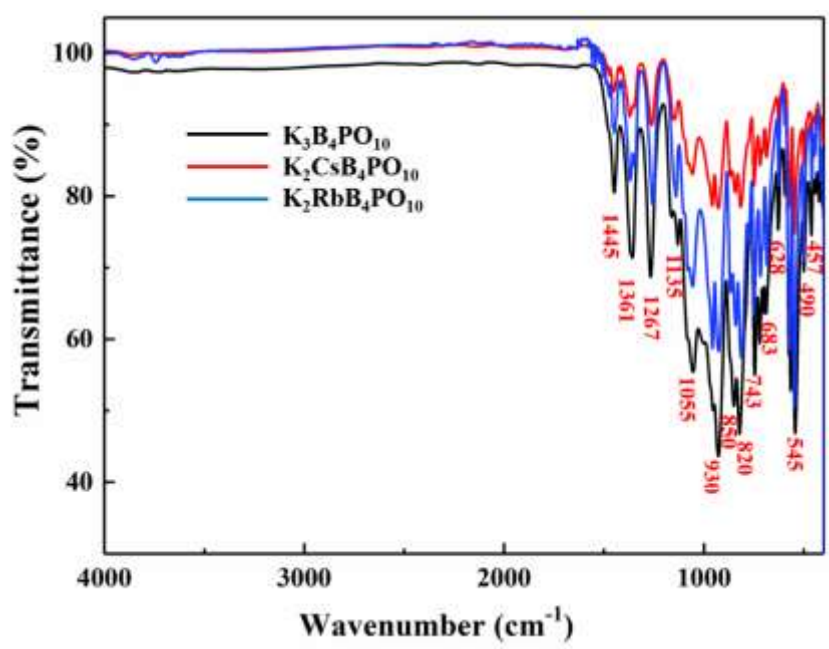

Figure S3. IR spectra of K<sub>3</sub>B<sub>4</sub>PO<sub>10</sub>, K<sub>2</sub>RbB<sub>4</sub>PO<sub>10</sub> and K<sub>2</sub>CsB<sub>4</sub>PO<sub>10</sub>.

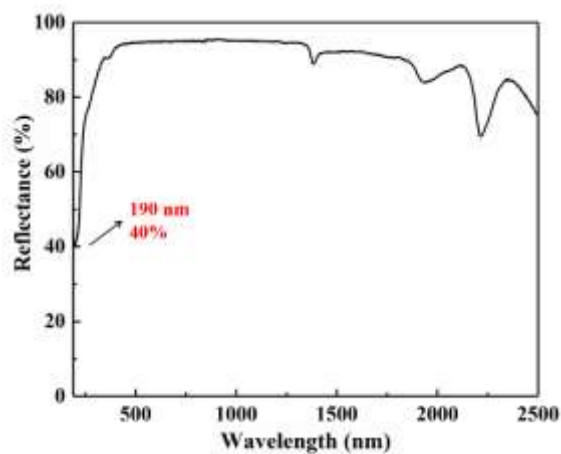

(a)

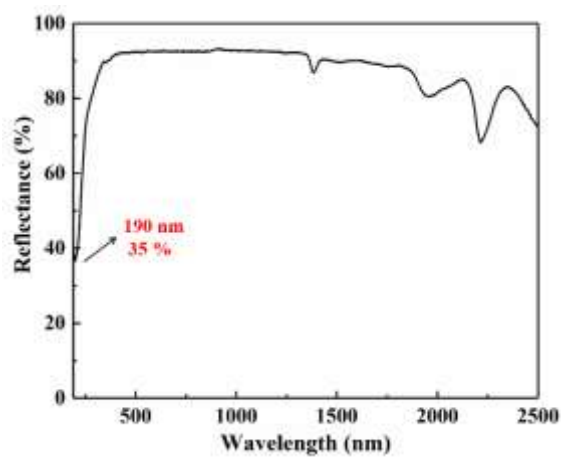

(b)

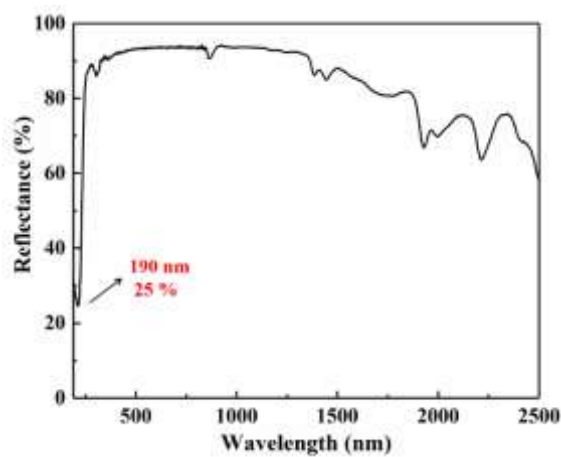

(c)

**Figure S4.** UV-vis-NIR diffuse reflectance spectra of  $K_3B_4PO_{10}$  (a),  $K_2RbB_4PO_{10}$  (b) and  $K_2CsB_4PO_{10}$  (c).

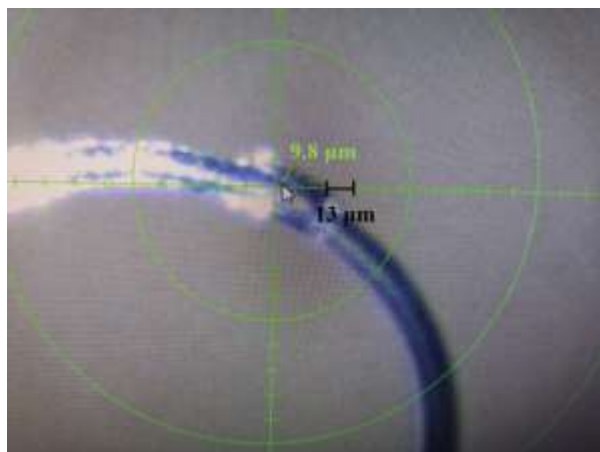

**Figure S5.** Photograph of crystal size.

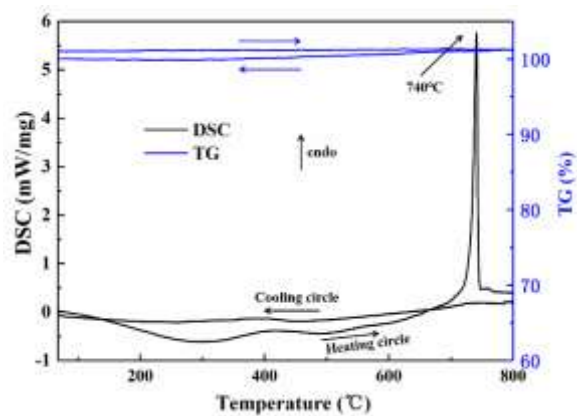

(a)

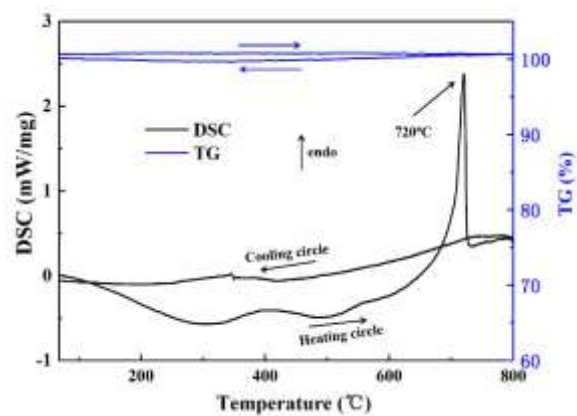

(b)

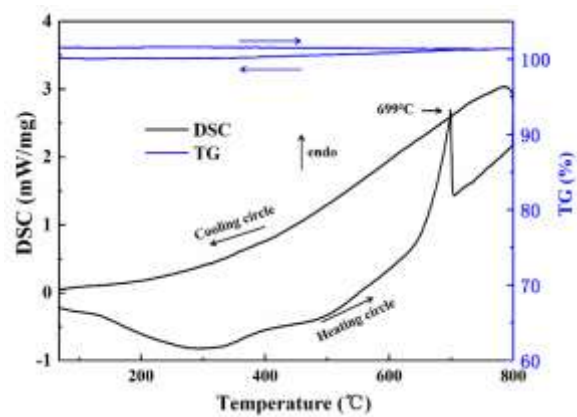

(c)

**Figure S6.** DSC-TG curves of  $\text{K}_3\text{B}_4\text{PO}_{10}$  (a),  $\text{K}_2\text{RbB}_4\text{PO}_{10}$  (b) and  $\text{K}_2\text{CsB}_4\text{PO}_{10}$  (c)



**Table S1.** A summary of mixed-coordinated borophosphates.

| <i>Borophosphates</i>                                                                                                                                        | B:P | BO <sub>3</sub> :BO<br>4 | Synthesis                            | Q <sup>n/CN</sup>                                                         | D |
|--------------------------------------------------------------------------------------------------------------------------------------------------------------|-----|--------------------------|--------------------------------------|---------------------------------------------------------------------------|---|
| M <sub>2</sub> [BP <sub>3</sub> O <sub>12</sub> ](M = Cr, V, Fe)                                                                                             | 1:3 | 3:0                      | Solid-state                          | B <sup>3/3</sup> , P <sup>1/4</sup>                                       | 0 |
| Co <sub>5</sub> [BPO <sub>6</sub> ][PO <sub>4</sub> ] <sub>2</sub>                                                                                           | 1:3 | 1:0                      | Low-temperature<br>flux              | B <sup>1/3</sup> , P <sup>1/4</sup>                                       | 0 |
| CsSc[B <sub>2</sub> P <sub>3</sub> O <sub>11</sub> (OH) <sub>3</sub> ]                                                                                       | 2:3 | 1:1                      | Hydrothermal                         | B <sup>2/3</sup> , B <sup>4/4</sup> , P <sup>1/4</sup> , P <sup>2/4</sup> | 0 |
| [C <sub>6</sub> H <sub>14</sub> N <sub>2</sub> ] <sub>2</sub> [VOB <sub>3</sub> P <sub>4</sub> O <sub>15</sub> (OH) <sub>5</sub> ]·4H <sub>2</sub> O         | 3:4 | 1:2                      | Hydrothermal                         | B <sup>2/3</sup> , B <sup>4/4</sup> , P <sup>1/4</sup> ,                  | 0 |
| Na <sub>2</sub> M[B <sub>3</sub> P <sub>2</sub> O <sub>11</sub> (OH)]·0.67H <sub>2</sub> O<br>(M = Cu, Mg, Mn-Zn)                                            | 3:2 | 1:2                      | Low-temperature<br>flux/Hydrothermal | B <sup>2/3</sup> , B <sup>4/4</sup> , P <sup>2/4</sup>                    | 1 |
| Na <sub>5</sub> (H <sub>3</sub> O)M <sub>3</sub> [B <sub>3</sub> P <sub>2</sub> O <sub>11</sub> (OH)] <sub>3</sub> ·2H <sub>2</sub> O<br>M = (Mg, Mn-Zn)     | 3:2 | 1:2                      | Hydrothermal                         | B <sup>2/3</sup> , B <sup>4/4</sup> , P <sup>2/4</sup>                    | 1 |
| Na <sub>5</sub> (NH <sub>4</sub> )Mn <sub>3</sub> [B <sub>9</sub> P <sub>6</sub> O <sub>33</sub> (OH) <sub>3</sub> ]·(H <sub>2</sub> O) <sub>1</sub>         | 3:2 | 1:2                      | Hydrothermal                         | B <sup>2/3</sup> , B <sup>4/4</sup> , P <sup>2/4</sup>                    | 1 |
| Na <sub>8</sub> [Cr <sub>4</sub> B <sub>12</sub> P <sub>8</sub> O <sub>44</sub> (OH) <sub>4</sub> ][P <sub>2</sub> O <sub>7</sub> ]·n(H <sub>2</sub> O)<br>) | 3:2 | 1:2                      | Hydrothermal                         | B <sup>2/3</sup> , B <sup>4/4</sup> , P <sup>2/4</sup>                    | 3 |
| Na <sub>2</sub> [VB <sub>3</sub> P <sub>2</sub> O <sub>12</sub> (OH)]·2.92(H <sub>2</sub> O)                                                                 | 3:2 | 1:2                      | Low-temperature<br>flux              | B <sup>2/3</sup> , B <sup>4/4</sup> , P <sup>2/4</sup>                    | 3 |
| Na <sub>5</sub> KCu <sub>3</sub> [B <sub>9</sub> P <sub>2</sub> O <sub>33</sub> (OH) <sub>3</sub> ]·(H <sub>2</sub> O)                                       | 3:2 | 1:2                      | Low-temperature<br>flux              | B <sup>2/3</sup> , B <sup>2/4</sup> , B <sup>4/4</sup> , P <sup>1/4</sup> | 1 |
| LiNa <sub>2</sub> B <sub>5</sub> P <sub>2</sub> O <sub>14</sub>                                                                                              | 5:2 | 2:3                      | Solid-state                          | B <sup>3/3</sup> , B <sup>3/4</sup> , P <sup>3/4</sup>                    | 2 |
| Li <sub>2</sub> B <sub>3</sub> PO <sub>8</sub>                                                                                                               | 3:1 | 2:1                      | Solid-state                          | B <sup>3/3</sup> , B <sup>4/4</sup> , P <sup>2/4</sup>                    | 2 |
| Li <sub>3</sub> [B <sub>3</sub> PO <sub>6</sub> (OH) <sub>3</sub> ]                                                                                          | 3:1 | 2:1                      | Hydrothermal                         | B <sup>2/3</sup> , B <sup>4/4</sup> , P <sup>2/4</sup>                    | 1 |
| (NH <sub>4</sub> ) <sub>2</sub> [B <sub>3</sub> PO <sub>7</sub> (OH) <sub>2</sub> ]                                                                          | 3:1 | 2:1                      | Hydrothermal                         | B <sup>2/3</sup> , B <sup>4/4</sup> , P <sup>2/4</sup>                    | 1 |
| (NH <sub>4</sub> )[B <sub>3</sub> PO <sub>6</sub> (OH) <sub>3</sub> ]·0.5H <sub>2</sub> O                                                                    | 3:1 | 2:1                      | Solvothermal                         | B <sup>2/3</sup> , B <sup>4/4</sup> , P <sup>2/4</sup>                    | 1 |
| K <sub>3</sub> [B <sub>5</sub> PO <sub>10</sub> (OH) <sub>3</sub> ]                                                                                          | 5:1 | 2:3                      | Hydrothermal                         | B <sup>2/3</sup> , B <sup>4/4</sup> , P <sup>2/4</sup>                    | 1 |
| Na <sub>3</sub> [B <sub>6</sub> PO <sub>13</sub> ]                                                                                                           | 6:1 | 4:2                      | Low-temperature<br>flux              | B <sup>3/3</sup> , B <sup>4/4</sup> , P <sup>2/4</sup>                    | 1 |
| K[B <sub>6</sub> PO <sub>10</sub> (OH) <sub>4</sub> ]                                                                                                        | 6:1 | 4:2                      | Hydrothermal                         | B <sup>2/3</sup> , B <sup>4/4</sup> , P <sup>4/4</sup>                    | 1 |
| K <sub>3</sub> B <sub>4</sub> PO <sub>10</sub> (in this paper)                                                                                               | 4:1 | 2:2                      | Solid-state                          | B <sup>3/3</sup> , B <sup>4/4</sup> , P <sup>2/4</sup>                    | 2 |
| K <sub>2</sub> MB <sub>4</sub> PO <sub>10</sub> (M = Rb/Cs)                                                                                                  |     |                          |                                      |                                                                           |   |

Q<sup>n/CN</sup>: the parameter connectedness; CN: the coordination number; n: the number of shared oxygen atoms.

**Table S2.** Crystal data and structure refinement for  $K_3B_4PO_{10}$ ,  $K_2RbB_4PO_{10}$ , and  $K_2CsB_4PO_{10}$ .

| Empirical formula                          | $K_3B_4PO_{10}$                                                                                                                        | $K_2RbB_4PO_{10}$                                        | $K_2CsB_4PO_{10}$                                        |
|--------------------------------------------|----------------------------------------------------------------------------------------------------------------------------------------|----------------------------------------------------------|----------------------------------------------------------|
| Formula weight                             | 351.51                                                                                                                                 | 397.88                                                   | 445.32                                                   |
| Temperature                                | 299(2) K                                                                                                                               | 273(2) K                                                 | 301(2) K                                                 |
| Wavelength                                 | 0.71073 Å                                                                                                                              | 0.71073 Å                                                | 0.71073 Å                                                |
| Crystal system                             | Triclinic                                                                                                                              | Triclinic                                                | Triclinic                                                |
| Space group                                | $P\bar{1}$                                                                                                                             | $P\bar{1}$                                               | $P\bar{1}$                                               |
| Unit cell dimensions                       | $a = 6.546(4)$ Å                                                                                                                       | $a = 6.5577(17)$ Å                                       | $a = 6.6235(9)$ Å                                        |
|                                            | $b = 6.567(4)$ Å                                                                                                                       | $b = 6.5931(17)$ Å                                       | $b = 6.6243(10)$ Å                                       |
|                                            | $c = 12.930(9)$ Å                                                                                                                      | $c = 13.098(3)$ Å                                        | $c = 13.273(2)$ Å                                        |
|                                            | $\alpha = 86.04(2)^\circ$                                                                                                              | $\alpha = 84.626(9)^\circ$                               | $\alpha = 79.738(4)^\circ$                               |
|                                            | $\beta = 81.40(2)^\circ$                                                                                                               | $\beta = 80.514(9)^\circ$                                | $\beta = 86.558(4)^\circ$                                |
|                                            | $\gamma = 60.420(15)^\circ$                                                                                                            | $\gamma = 60.457(8)^\circ$                               | $\gamma = 60.095(4)^\circ$                               |
| Volume                                     | $477.9(6)$ Å <sup>3</sup>                                                                                                              | $485.9(2)$ Å <sup>3</sup>                                | $496.47(13)$ Å <sup>3</sup>                              |
| Z                                          | 2                                                                                                                                      | 2                                                        | 2                                                        |
| Density (g/cm <sup>3</sup> )               | 2.443                                                                                                                                  | 2.719                                                    | 2.979                                                    |
| Absorption coefficient (mm <sup>-1</sup> ) | 1.637                                                                                                                                  | 6.158                                                    | 4.770                                                    |
| F(000)                                     | 344                                                                                                                                    | 380                                                      | 416                                                      |
| Theta range for data collection            | 3.19 to 27.69°                                                                                                                         | 3.15 to 27.53°                                           | 3.12 to 27.55°                                           |
| Limiting indices                           | $-8 \leq h \leq 8, -8 \leq k \leq 8, -16 \leq l \leq 16$                                                                               | $-8 \leq h \leq 8, -8 \leq k \leq 8, -16 \leq l \leq 16$ | $-8 \leq h \leq 8, -8 \leq k \leq 8, -17 \leq l \leq 17$ |
| Reflections collected / unique             | 6430 / 2210 [R(int) = 0.0415]                                                                                                          | 8699 / 2234 [R(int) = 0.0380]                            | 11152 / 2295 [R(int) = 0.0405]                           |
| Completeness to theta                      | 98.50%                                                                                                                                 | 99.6%                                                    | 99.8%                                                    |
| Refinement method                          | Full-matrix least-squares on $F^2$                                                                                                     |                                                          |                                                          |
| Data / restraints / parameters             | 2210 / 0 / 163                                                                                                                         | 2234 / 0 / 163                                           | 2295 / 0 / 163                                           |
| Goodness-of-fit on $F^2$                   | 0.962                                                                                                                                  | 1.098                                                    | 0.939                                                    |
| Final R indices                            | $R_1 = 0.0384$                                                                                                                         | $R_1 = 0.0437$                                           | $R_1 = 0.0293$                                           |
| $[F_o^2 > 2\sigma(F_o^2)]^{[a]}$           | $wR_2 = 0.1226$                                                                                                                        | $wR_2 = 0.1399$                                          | $wR_2 = 0.1050$                                          |
| R indices (all data) <sup>[a]</sup>        | $R_1 = 0.0482$                                                                                                                         | $R_1 = 0.0576$                                           | $R_1 = 0.0338$                                           |
|                                            | $wR_2 = 0.1350$                                                                                                                        | $wR_2 = 0.1529$                                          | $wR_2 = 0.1134$                                          |
| Largest diff. peak and hole                | 0.703 and -0.778 e <sup>-</sup> Å <sup>-3</sup>                                                                                        | 0.745 and -1.199 e <sup>-</sup> Å <sup>-3</sup>          | 1.847 and -0.915 e <sup>-</sup> Å <sup>-3</sup>          |
|                                            | [a] $R_1 = \sum   F_o  -  F_c   / \sum  F_o $ and $wR_2 = [\sum w(F_o^2 - F_c^2)^2 / \sum w F_o^4]^{1/2}$ for $F_o^2 > 2\sigma(F_o^2)$ |                                                          |                                                          |

**Table S3.** Atomic coordinates ( $\times 10^4$ ) and equivalent isotropic displacement parameters ( $\text{\AA}^2 \times 10^3$ ) for  $\text{K}_3\text{B}_4\text{PO}_{10}$  U(eq) is defined as one third of the trace of the orthogonalized  $U_{ij}$  tensor.

| Atoms | x        | y       | z       | U(eq) | BVS  |
|-------|----------|---------|---------|-------|------|
| K1    | 8580(1)  | 9243(2) | 6540(1) | 45(1) | 0.76 |
| K2    | 4756(1)  | 3246(1) | 4029(1) | 27(1) | 1.16 |
| K3    | 11015(1) | 2051(1) | 632(1)  | 20(1) | 1.26 |
| P1    | 8046(1)  | 7275(1) | 3721(1) | 18(1) | 4.83 |
| B1    | 5592(5)  | 2939(5) | 1388(2) | 14(1) | 3.07 |
| B2    | 4674(5)  | 6949(5) | 1448(3) | 18(1) | 3.08 |
| B3    | 7288(5)  | 8671(5) | 1698(2) | 14(1) | 3.05 |
| B4    | 11434(5) | 5963(5) | 2032(3) | 16(1) | 3.06 |
| O1    | 9521(3)  | 6576(3) | 1455(1) | 15(1) | 2.01 |
| O2    | 7387(3)  | 730(3)  | 1238(2) | 18(1) | 2.11 |
| O3    | 3328(3)  | 3529(3) | 1789(2) | 17(1) | 2.06 |
| O4    | 6242(3)  | 4644(3) | 1157(2) | 26(1) | 2.14 |
| O5    | 5353(3)  | 8587(3) | 1293(2) | 23(1) | 2.11 |
| O6    | 2413(3)  | 7587(3) | 1863(2) | 24(1) | 2.04 |
| O7    | 6658(4)  | 9070(4) | 2874(2) | 28(1) | 2.00 |
| O8    | 10690(3) | 5965(4) | 3189(2) | 33(1) | 2.06 |
| O9    | 7893(4)  | 8648(4) | 4638(2) | 31(1) | 1.88 |
| O10   | 7150(5)  | 5563(5) | 3961(2) | 42(1) | 1.87 |

**Table S4.** Atomic coordinates ( $\times 10^4$ ) and equivalent isotropic displacement parameters ( $\text{\AA}^2 \times 10^3$ ) for  $\text{K}_2\text{RbB}_4\text{PO}_{10}$   $U(\text{eq})$  is defined as one third of the trace of the orthogonalized  $U_{ij}$  tensor.

| Atoms | x        | y       | z       | U(eq) | BVS  |
|-------|----------|---------|---------|-------|------|
| Rb1   | 8678(1)  | 9293(1) | 6536(1) | 37(1) | 0.86 |
| K1    | 10980(2) | 2022(2) | 630(1)  | 18(1) | 1.25 |
| K2    | 4674(2)  | 3259(2) | 4022(1) | 25(1) | 1.11 |
| B1    | 7231(9)  | 8646(9) | 1676(4) | 16(1) | 3.05 |
| B2    | 5541(9)  | 2909(9) | 1369(4) | 16(1) | 3.05 |
| B3    | 4617(9)  | 6902(9) | 1460(4) | 17(1) | 3.06 |
| B4    | 11382(9) | 5898(8) | 1998(4) | 16(1) | 3.06 |
| P1    | 8010(2)  | 7256(2) | 3681(1) | 18(1) | 4.79 |
| O1    | 9457(6)  | 6558(5) | 1433(2) | 16(1) | 1.99 |
| O2    | 7298(5)  | 721(5)  | 1182(3) | 19(1) | 2.10 |
| O3    | 3260(5)  | 3494(6) | 1741(3) | 18(1) | 2.07 |
| O4    | 6220(6)  | 4623(6) | 1179(3) | 27(1) | 2.11 |
| O5    | 2334(6)  | 7536(6) | 1822(3) | 22(1) | 2.08 |
| O6    | 5268(6)  | 8577(6) | 1338(3) | 22(1) | 2.11 |
| O7    | 6674(6)  | 9103(6) | 2837(3) | 26(1) | 2.00 |
| O8    | 10638(6) | 5848(6) | 3145(3) | 27(1) | 2.07 |
| O9    | 7923(7)  | 8621(6) | 4567(3) | 28(1) | 1.85 |
| O10   | 6988(8)  | 5660(7) | 3970(3) | 35(1) | 1.89 |

**Table S5.** Atomic coordinates ( $\times 10^4$ ) and equivalent isotropic displacement parameters ( $\text{\AA}^2 \times 10^3$ ) for  $\text{K}_2\text{CsB}_4\text{PO}_{10}$   $U(\text{eq})$  is defined as one third of the trace of the orthogonalized  $U_{ij}$  tensor.

| Atoms | x       | y        | z       | U(eq) | BVS  |
|-------|---------|----------|---------|-------|------|
| Cs1   | 9406(1) | 1841(1)  | 3468(1) | 25(1) | 1.03 |
| K1    | 3283(1) | 12137(1) | 5981(1) | 15(1) | 0.97 |
| K2    | 1991(1) | -2853(2) | 9363(1) | 19(1) | 1.22 |
| P1    | 7207(2) | 4834(2)  | 6375(1) | 15(1) | 4.78 |
| B1    | 6841(7) | -1363(8) | 8568(3) | 14(1) | 3.08 |
| B2    | 2865(7) | 1723(8)  | 8662(3) | 13(1) | 3.07 |
| B3    | 8594(7) | 4282(7)  | 8350(3) | 12(1) | 3.03 |
| B4    | 5867(8) | 2854(8)  | 8072(4) | 13(1) | 3.02 |
| O1    | 6506(4) | 4166(5)  | 8599(2) | 13(1) | 1.99 |
| O2    | 3459(5) | 3395(5)  | 8324(2) | 16(1) | 2.07 |
| O3    | 669(4)  | 2164(5)  | 8872(2) | 15(1) | 2.07 |
| O4    | 5799(5) | 3635(6)  | 6913(2) | 22(1) | 2.04 |
| O5    | 7494(5) | 294(5)   | 8281(2) | 18(1) | 1.92 |
| O6    | 8495(5) | -3642(5) | 8639(2) | 20(1) | 2.08 |
| O7    | 4531(5) | -653(6)  | 8785(3) | 25(1) | 2.12 |
| O8    | 5640(6) | 7461(6)  | 6066(3) | 28(1) | 1.85 |
| O9    | 8528(6) | 3589(6)  | 5511(2) | 24(1) | 1.71 |
| O10   | 9071(5) | 4315(6)  | 7215(2) | 21(1) | 1.98 |

**Table S6.** Selected distances (Å) and angles (deg) for K<sub>3</sub>B<sub>4</sub>PO<sub>10</sub>.

|                     |           |                    |            |
|---------------------|-----------|--------------------|------------|
| K(1)-O(9)           | 2.654(3)  | K(3)-O(4)          | 2.719(3)   |
| K(1)-O(6)#9         | 2.807(3)  | K(3)-O(3)#1        | 2.793(2)   |
| K(1)-O(7)#9         | 3.025(3)  | K(3)-O(1)#2        | 2.803(3)   |
| K(1)-O(10)#8        | 3.037(3)  | K(3)-O(5)#3        | 2.837(2)   |
| K(1)-O(8)#8         | 3.213(4)  | K(3)-O(1)          | 2.859(3)   |
| K(1)-O(3)#5         | 3.231(3)  | K(3)-O(2)#4        | 2.871(3)   |
| K(1)-O(5)#9         | 3.359(3)  | B(1)-O(2)          | 1.345(3)   |
| K(1)-O(9)#10        | 3.373(3)  | B(1)-O(3)          | 1.359(3)   |
| K(2)-O(10)          | 2.659(3)  | B(1)-O(4)          | 1.382(4)   |
| K(2)-O(10)#5        | 2.696(3)  | B(2)-O(4)          | 1.384(4)   |
| K(2)-O(8)#6         | 2.713(3)  | B(2)-O(5)          | 1.346(4)   |
| K(2)-O(7)#7         | 2.818(3)  | B(2)-O(6)          | 1.355(4)   |
| K(2)-O(9)#7         | 2.826(3)  | B(3)-O(1)          | 1.437(3)   |
| K(2)-O(9)#5         | 2.909(3)  | B(3)#7-O(2)        | 1.466(4)   |
| K(2)-O(3)           | 3.141(3)  | B(3)-O(5)          | 1.467(3)   |
| P(1)-O(9)           | 1.500(2)  | B(3)-O(7)          | 1.521(4)   |
| P(1)-O(10)          | 1.501(3)  | B(4)-O(1)          | 1.424(4)   |
| P(1)-O(8)           | 1.570(2)  | B(4)#6-O(3)        | 1.479(3)   |
| P(1)-O(7)           | 1.574(2)  | B(4)#6-O(6)        | 1.482(4)   |
| K(3)-O(2)           | 2.896(2)  | B(4)-O(8)          | 1.502(4)   |
| K(3)-O(6)#3         | 3.017(3)  | O(9)-K(1)-O(6)#9   | 147.02(8)  |
| O(9)-K(1)-O(7)#9    | 85.28(8)  | O(9)#7-K(2)-O(3)   | 113.66(7)  |
| O(6)#9-K(1)-O(7)#9  | 80.80(7)  | O(9)#5-K(2)-O(3)   | 105.27(7)  |
| O(9)-K(1)-O(10)#8   | 80.72(8)  | O(9)-P(1)-O(10)    | 115.67(15) |
| O(6)#9-K(1)-O(10)#8 | 129.79(8) | O(9)-P(1)-O(8)     | 108.50(13) |
| O(7)#9-K(1)-O(10)#8 | 133.01(8) | O(10)-P(1)-O(8)    | 109.78(15) |
| O(9)-K(1)-O(8)#8    | 81.23(7)  | O(9)-P(1)-O(7)     | 107.85(14) |
| O(6)#9-K(1)-O(8)#8  | 127.11(8) | O(10)-P(1)-O(7)    | 109.92(15) |
| O(7)#9-K(1)-O(8)#8  | 86.39(6)  | O(8)-P(1)-O(7)     | 104.52(12) |
| O(10)#8-K(1)-O(8)#8 | 47.30(7)  | O(4)-K(3)-O(3)#1   | 110.11(8)  |
| O(9)-K(1)-O(3)#5    | 109.29(8) | O(5)#3-K(3)-O(1)   | 111.91(7)  |
| O(6)#9-K(1)-O(3)#5  | 88.46(8)  | O(4)-K(3)-O(2)#4   | 116.28(7)  |
| O(7)#9-K(1)-O(3)#5  | 58.37(6)  | O(3)#1-K(3)-O(2)#4 | 131.68(6)  |
| O(10)#8-K(1)-O(3)#5 | 84.60(8)  | O(1)#2-K(3)-O(2)#4 | 49.85(7)   |
| O(8)#8-K(1)-O(3)#5  | 42.92(6)  | O(5)#3-K(3)-O(2)#4 | 85.06(7)   |
| O(9)-K(1)-O(5)#9    | 129.50(8) | O(1)-K(3)-O(2)#4   | 144.90(6)  |
| O(6)#9-K(1)-O(5)#9  | 43.29(6)  | O(4)-K(3)-O(2)     | 48.10(7)   |
| O(7)#9-K(1)-O(5)#9  | 44.29(6)  | O(3)#1-K(3)-O(2)   | 132.30(7)  |
| O(10)#8-K(1)-O(5)#9 | 131.68(7) | O(1)#2-K(3)-O(2)   | 103.11(6)  |
| O(8)#8-K(1)-O(5)#9  | 95.31(6)  | O(5)#3-K(3)-O(2)   | 109.91(8)  |
| O(3)#5-K(1)-O(5)#9  | 52.42(6)  | O(1)-K(3)-O(2)     | 110.36(7)  |
| O(9)-K(1)-O(9)#10   | 86.98(8)  | O(2)#4-K(3)-O(2)   | 90.51(6)   |

|                      |            |                    |           |
|----------------------|------------|--------------------|-----------|
| O(6)#9-K(1)-O(9)#10  | 83.91(7)   | O(4)-K(3)-O(6)#3   | 104.71(7) |
| O(7)#9-K(1)-O(9)#10  | 138.31(7)  | O(3)#1-K(3)-O(6)#3 | 93.15(7)  |
| O(10)#8-K(1)-O(9)#10 | 85.57(8)   | O(1)#2-K(3)-O(6)#3 | 136.67(6) |
| O(8)#8-K(1)-O(9)#10  | 132.58(6)  | O(5)#3-K(3)-O(6)#3 | 46.81(6)  |
| O(3)#5-K(1)-O(9)#10  | 159.29(6)  | O(1)-K(3)-O(6)#3   | 126.49(7) |
| O(5)#9-K(1)-O(9)#10  | 126.26(6)  | O(2)#4-K(3)-O(6)#3 | 87.82(8)  |
| O(4)-K(3)-O(1)#2     | 89.51(7)   | O(2)-K(3)-O(6)#3   | 63.15(6)  |
| O(3)#1-K(3)-O(1)#2   | 120.42(7)  | O(4)-K(3)-O(5)#2   | 136.90(7) |
| O(4)-K(3)-O(5)#3     | 145.90(7)  | O(3)#1-K(3)-O(5)#2 | 89.65(8)  |
| O(3)#1-K(3)-O(5)#3   | 62.31(7)   | O(1)#2-K(3)-O(5)#2 | 48.19(6)  |
| O(1)#2-K(3)-O(5)#3   | 123.68(7)  | O(5)#3-K(3)-O(5)#2 | 77.18(8)  |
| O(4)-K(3)-O(1)       | 66.49(6)   | O(1)-K(3)-O(5)#2   | 105.39(6) |
| O(3)#1-K(3)-O(1)     | 49.86(6)   | O(2)#4-K(3)-O(5)#2 | 46.65(6)  |
| O(1)#2-K(3)-O(1)     | 96.79(7)   | O(2)-K(3)-O(5)#2   | 136.71(7) |
| O(10)-K(2)-O(10)#5   | 93.48(8)   | O(6)#3-K(3)-O(5)#2 | 112.24(6) |
| O(10)-K(2)-O(8)#6    | 108.76(10) | O(2)-B(1)-O(3)     | 124.7(3)  |
| O(10)#5-K(2)-O(8)#6  | 96.30(9)   | O(2)-B(1)-O(4)     | 114.5(2)  |
| O(10)-K(2)-O(7)#7    | 120.30(9)  | O(3)-B(1)-O(4)     | 120.7(2)  |
| O(10)#5-K(2)-O(7)#7  | 133.42(8)  | O(5)-B(2)-O(6)     | 119.4(2)  |
| O(8)#6-K(2)-O(7)#7   | 101.10(8)  | O(5)-B(2)-O(4)     | 120.6(3)  |
| O(10)-K(2)-O(9)#7    | 105.29(10) | O(6)-B(2)-O(4)     | 120.0(3)  |
| O(10)#5-K(2)-O(9)#7  | 90.58(8)   | O(1)-B(3)-O(2)#11  | 111.0(2)  |
| O(8)#6-K(2)-O(9)#7   | 144.71(8)  | O(1)-B(3)-O(5)     | 112.2(2)  |
| O(7)#7-K(2)-O(9)#7   | 52.24(7)   | O(2)#11-B(3)-O(5)  | 107.1(2)  |
| O(10)-K(2)-O(9)#5    | 145.97(8)  | O(1)-B(3)-O(7)     | 110.6(2)  |
| O(10)#5-K(2)-O(9)#5  | 53.72(7)   | O(2)#11-B(3)-O(7)  | 107.3(2)  |
| O(8)#6-K(2)-O(9)#5   | 86.15(9)   | O(5)-B(3)-O(7)     | 108.6(2)  |
| O(7)#7-K(2)-O(9)#5   | 84.62(8)   | O(1)-B(4)-O(3)#1   | 110.4(2)  |
| O(9)#7-K(2)-O(9)#5   | 70.30(9)   | O(1)-B(4)-O(6)#1   | 113.2(2)  |
| O(10)-K(2)-O(3)      | 107.10(7)  | O(3)#1-B(4)-O(6)#1 | 110.4(2)  |
| O(10)#5-K(2)-O(3)    | 141.61(8)  | O(1)-B(4)-O(8)     | 111.6(2)  |
| O(8)#6-K(2)-O(3)     | 46.79(6)   | O(3)#1-B(4)-O(8)   | 104.5(2)  |
| O(7)#7-K(2)-O(3)     | 61.42(6)   | O(6)#1-B(4)-O(8)   | 106.3(2)  |

Symmetry transformations used to generate equivalent atoms:

#1  $x-1, y, z$     #2  $x-1, y+1, z$     #3  $-x+2, -y, -z$

#4  $-x+3, -y, -z$     #5  $-x+2, -y+1, -z$     #6  $-x+2, -y+1, -z+1$

#7  $x+1, y, z$     #8  $x, y+1, z$

#9  $-x+1, -y, -z+1$     #10  $-x+1, -y+1, -z+1$     #11  $-x+1, -y+2, -z+1$

#12  $x, y-1, z$     #13  $-x+2, -y+2, -z+1$     #14  $x+1, y-1, z$

**Table S7.** Selected distances (Å) and angles (deg) for K<sub>2</sub>RbB<sub>4</sub>PO<sub>10</sub>.

|                      |            |                      |            |
|----------------------|------------|----------------------|------------|
| Rb(1)-O(9)           | 2.818(4)   | K(2)-O(9)#4          | 2.910(4)   |
| Rb(1)-O(5)#1         | 2.905(4)   | K(2)-O(3)            | 3.239(4)   |
| Rb(1)-O(7)#1         | 3.108(4)   | P(1)-O(10)           | 1.496(4)   |
| Rb(1)-O(10)#2        | 3.132(5)   | P(1)-O(9)            | 1.510(4)   |
| Rb(1)-O(8)#2         | 3.188(4)   | P(1)-O(8)            | 1.572(4)   |
| Rb(1)-O(9)#3         | 3.246(4)   | P(1)-O(7)            | 1.577(4)   |
| Rb(1)-O(3)#4         | 3.266(3)   | B(4)-O(1)            | 1.427(6)   |
| Rb(1)-O(6)#1         | 3.346(4)   | B(1)-O(1)            | 1.440(6)   |
| K(1)-O(4)            | 2.723(3)   | B(2)-O(2)            | 1.343(6)   |
| K(1)-O(3)#5          | 2.777(4)   | B(1)#10-O(2)         | 1.475(6)   |
| K(1)-O(1)#6          | 2.789(3)   | B(2)-O(3)            | 1.360(6)   |
| K(1)-O(2)#7          | 2.843(4)   | B(4)#9-O(3)          | 1.476(6)   |
| K(1)-O(6)#8          | 2.845(3)   | B(3)-O(4)            | 1.384(6)   |
| K(1)-O(1)            | 2.889(3)   | B(2)-O(4)            | 1.395(6)   |
| K(1)-O(2)            | 2.905(3)   | B(3)-O(5)            | 1.351(6)   |
| K(1)-O(5)#8          | 2.996(4)   | B(4)#9-O(5)          | 1.477(6)   |
| K(2)-O(10)           | 2.670(4)   | B(3)-O(6)            | 1.355(6)   |
| K(2)-O(10)#4         | 2.694(4)   | B(1)-O(6)            | 1.450(6)   |
| K(2)-O(8)#9          | 2.724(4)   | B(1)-O(7)            | 1.528(6)   |
| K(2)-O(9)#10         | 2.840(4)   | B(4)-O(8)            | 1.504(6)   |
| K(2)-O(7)#10         | 2.866(4)   | O(9)-Rb(1)-O(5)#1    | 148.71(11) |
| O(9)-Rb(1)-O(7)#1    | 84.80(11)  | O(1)#6-K(1)-O(5)#8   | 135.90(10) |
| O(5)#1-Rb(1)-O(7)#1  | 81.19(10)  | O(2)#7-K(1)-O(5)#8   | 86.36(10)  |
| O(9)-Rb(1)-O(10)#2   | 79.66(11)  | O(6)#8-K(1)-O(5)#8   | 46.75(9)   |
| O(5)#1-Rb(1)-O(10)#2 | 129.96(10) | O(1)-K(1)-O(5)#8     | 127.58(10) |
| O(7)#1-Rb(1)-O(10)#2 | 131.01(10) | O(2)-K(1)-O(5)#8     | 63.93(9)   |
| O(9)-Rb(1)-O(8)#2    | 80.36(10)  | O(4)-K(1)-O(6)#6     | 137.49(11) |
| O(5)#1-Rb(1)-O(8)#2  | 125.66(10) | O(3)#5-K(1)-O(6)#6   | 89.36(10)  |
| O(7)#1-Rb(1)-O(8)#2  | 84.89(10)  | O(1)#6-K(1)-O(6)#6   | 47.28(9)   |
| O(10)#2-Rb(1)-O(8)#2 | 46.90(10)  | O(2)#7-K(1)-O(6)#6   | 45.70(9)   |
| O(9)-Rb(1)-O(9)#3    | 89.47(11)  | O(6)#8-K(1)-O(6)#6   | 78.36(11)  |
| O(5)#1-Rb(1)-O(9)#3  | 83.41(10)  | O(1)-K(1)-O(6)#6     | 105.46(9)  |
| O(7)#1-Rb(1)-O(9)#3  | 139.50(10) | O(2)-K(1)-O(6)#6     | 135.38(10) |
| O(10)#2-Rb(1)-O(9)#3 | 86.76(10)  | O(5)#8-K(1)-O(6)#6   | 111.83(9)  |
| O(8)#2-Rb(1)-O(9)#3  | 133.54(9)  | B(1)#6-K(1)-O(6)#6   | 26.94(11)  |
| O(9)-Rb(1)-O(3)#4    | 108.66(10) | O(10)-K(2)-O(10)#4   | 89.74(12)  |
| O(5)#1-Rb(1)-O(3)#4  | 86.85(10)  | O(10)-K(2)-O(8)#9    | 109.79(13) |
| O(7)#1-Rb(1)-O(3)#4  | 57.25(9)   | O(10)#4-K(2)-O(8)#9  | 100.73(13) |
| O(10)#2-Rb(1)-O(3)#4 | 84.48(9)   | O(10)-K(2)-O(9)#10   | 105.30(13) |
| O(8)#2-Rb(1)-O(3)#4  | 43.02(9)   | O(10)#4-K(2)-O(9)#10 | 91.08(12)  |
| O(9)#3-Rb(1)-O(3)#4  | 158.00(9)  | O(8)#9-K(2)-O(9)#10  | 142.86(13) |
| O(9)-Rb(1)-O(6)#1    | 128.60(10) | O(10)-K(2)-O(7)#10   | 120.47(13) |
| O(5)#1-Rb(1)-O(6)#1  | 42.88(9)   | O(10)#4-K(2)-O(7)#10 | 135.04(12) |



|                      |            |                      |            |
|----------------------|------------|----------------------|------------|
| O(7)#1-Rb(1)-O(6)#1  | 43.89(9)   | O(8)#9-K(2)-O(7)#10  | 98.93(12)  |
| O(10)#2-Rb(1)-O(6)#1 | 131.91(10) | O(9)#10-K(2)-O(7)#10 | 51.38(10)  |
| O(8)#2-Rb(1)-O(6)#1  | 94.97(9)   | O(10)-K(2)-O(9)#4    | 142.52(13) |
| O(9)#3-Rb(1)-O(6)#1  | 125.18(9)  | O(10)#4-K(2)-O(9)#4  | 53.61(11)  |
| O(3)#4-Rb(1)-O(6)#1  | 52.00(8)   | O(8)#9-K(2)-O(9)#4   | 87.14(12)  |
| O(9)-Rb(1)-O(8)#3    | 117.76(10) | O(9)#10-K(2)-O(9)#4  | 71.79(13)  |
| O(5)#1-Rb(1)-O(8)#3  | 42.32(9)   | O(7)#10-K(2)-O(9)#4  | 87.72(11)  |
| O(7)#1-Rb(1)-O(8)#3  | 106.18(9)  | O(10)-K(2)-O(3)      | 108.50(11) |
| O(10)#2-Rb(1)-O(8)#3 | 122.22(10) | O(10)#4-K(2)-O(3)    | 145.30(12) |
| O(8)#2-Rb(1)-O(8)#3  | 159.01(12) | O(8)#9-K(2)-O(3)     | 45.78(10)  |
| O(9)#3-Rb(1)-O(8)#3  | 43.39(9)   | O(9)#10-K(2)-O(3)    | 111.10(10) |
| O(3)#4-Rb(1)-O(8)#3  | 129.08(9)  | O(7)#10-K(2)-O(3)    | 59.72(9)   |
| O(6)#1-Rb(1)-O(8)#3  | 81.95(8)   | O(9)#4-K(2)-O(3)     | 107.11(10) |
| B(3)#1-Rb(1)-O(8)#3  | 59.00(11)  | O(10)-P(1)-O(9)      | 114.9(2)   |
| O(4)-K(1)-O(3)#5     | 108.96(11) | O(10)-P(1)-O(8)      | 110.1(2)   |
| O(4)-K(1)-O(1)#6     | 91.08(11)  | O(9)-P(1)-O(8)       | 109.3(2)   |
| O(3)#5-K(1)-O(1)#6   | 118.99(11) | O(10)-P(1)-O(7)      | 110.9(2)   |
| O(4)-K(1)-O(2)#7     | 118.94(11) | O(9)-P(1)-O(7)       | 106.5(2)   |
| O(3)#5-K(1)-O(2)#7   | 130.14(10) | O(8)-P(1)-O(7)       | 104.57(19) |
| O(1)#6-K(1)-O(2)#7   | 50.61(9)   | O(1)-B(1)-O(6)       | 113.0(4)   |
| O(4)-K(1)-O(6)#8     | 144.14(12) | O(1)-B(1)-O(2)#11    | 111.3(4)   |
| O(3)#5-K(1)-O(6)#8   | 62.07(10)  | O(6)-B(1)-O(2)#11    | 106.9(4)   |
| O(1)#6-K(1)-O(6)#8   | 124.22(11) | O(1)-B(1)-O(7)       | 110.9(4)   |
| O(2)#7-K(1)-O(6)#8   | 84.83(11)  | O(6)-B(1)-O(7)       | 108.8(4)   |
| O(4)-K(1)-O(1)       | 65.47(10)  | O(2)#11-B(1)-O(7)    | 105.5(4)   |
| O(3)#5-K(1)-O(1)     | 49.67(9)   | O(2)-B(2)-O(3)       | 124.6(4)   |
| O(1)#6-K(1)-O(1)     | 96.49(9)   | O(2)-B(2)-O(4)       | 114.9(4)   |
| O(2)#7-K(1)-O(1)     | 145.05(10) | O(3)-B(2)-O(4)       | 120.4(4)   |
| O(6)#8-K(1)-O(1)     | 111.31(10) | O(5)-B(3)-O(6)       | 118.1(4)   |
| O(4)-K(1)-O(2)       | 48.28(10)  | O(5)-B(3)-O(4)       | 120.9(4)   |
| O(3)#5-K(1)-O(2)     | 134.27(11) | O(6)-B(3)-O(4)       | 120.9(4)   |
| O(1)#6-K(1)-O(2)     | 102.38(10) | O(1)-B(4)-O(3)#5     | 110.3(4)   |
| O(2)#7-K(1)-O(2)     | 90.49(9)   | O(1)-B(4)-O(5)#5     | 112.3(4)   |
| O(6)#8-K(1)-O(2)     | 110.67(10) | O(3)#5-B(4)-O(5)#5   | 110.9(4)   |
| O(1)-K(1)-O(2)       | 110.60(10) | O(1)-B(4)-O(8)       | 111.4(4)   |
| O(4)-K(1)-O(5)#8     | 104.66(10) | O(3)#5-B(4)-O(8)     | 105.2(4)   |
| O(3)#5-K(1)-O(5)#8   | 94.73(10)  | O(5)#5-B(4)-O(8)     | 106.5(4)   |

Symmetry transformations used to generate equivalent atoms:

#1 x, y-1, z      #2 x-1, y, z      #3 -x+1, -y+1, -z+1  
#4 -x+2, -y+1, -z+1      #5 -x+1, -y+2, -z+1      #6 -x+2, -y+2, -z+1

#7  $x-1, y+1, z$     #8  $-x+2, -y, -z$

#9  $-x+3, -y, -z$     #10  $-x+2, -y+1, -z$     #11  $x+1, y, z$

#12  $x, y+1, z$     #13  $-x+1, -y, -z+1$     #14  $x+1, y-1, z$

**Table S8.** Selected distances (Å) and angles (deg) for K<sub>2</sub>CsB<sub>4</sub>PO<sub>10</sub>.

|                      |           |                     |            |
|----------------------|-----------|---------------------|------------|
| Cs(1)-O(9)           | 3.047(3)  | K(2)-O(5)#10        | 2.922(3)   |
| Cs(1)-O(5)#1         | 3.051(3)  | K(2)-O(3)           | 2.938(3)   |
| Cs(1)-O(10)#2        | 3.155(3)  | P(1)-O(9)           | 1.502(3)   |
| Cs(1)-O(8)#3         | 3.175(3)  | P(1)-O(8)           | 1.506(3)   |
| Cs(1)-O(9)#1         | 3.198(3)  | P(1)-O(4)           | 1.571(3)   |
| Cs(1)-O(4)#3         | 3.239(3)  | P(1)-O(10)          | 1.579(3)   |
| Cs(1)-O(2)#3         | 3.334(3)  | B(1)-O(1)           | 1.357(5)   |
| Cs(1)-O(6)#1         | 3.343(3)  | B(1)-O(1)           | 1.342(5)   |
| K(1)-O(8)            | 2.668(4)  | B(1)-O(2)           | 1.386(5)   |
| K(1)-O(4)#5          | 2.761(3)  | B(2)-O(2)           | 1.349(5)   |
| K(1)-O(8)#4          | 2.768(4)  | B(2)-O(3)           | 1.355(5)   |
| K(1)-O(9)#6          | 2.870(3)  | B(2)-O(3)           | 1.385(5)   |
| K(1)-O(9)#4          | 2.877(3)  | B(3)-O(4)           | 1.438(5)   |
| K(1)-O(10)#6         | 2.971(3)  | B(3)-O(5)           | 1.519(5)   |
| K(2)-O(7)            | 2.727(3)  | B(3)#10-O(5)        | 1.477(5)   |
| K(2)-O(2)#7          | 2.771(3)  | B(3)#7-O(6)         | 1.462(5)   |
| K(2)-O(1)#8          | 2.771(3)  | B(4)-O(6)           | 1.430(5)   |
| K(2)-O(3)#9          | 2.807(3)  | B(4)-O(7)           | 1.480(5)   |
| K(2)-O(6)#10         | 2.866(3)  | B(4)-O(7)           | 1.530(5)   |
| K(2)-O(1)#7          | 2.887(3)  | B(4)-O(10)          | 1.470(5)   |
| O(9)-Cs(1)-O(5)#1    | 152.90(8) | O(9)#6-K(1)-O(2)#5  | 107.45(8)  |
| O(9)-Cs(1)-O(10)#2   | 84.12(8)  | O(9)#4-K(1)-O(2)#5  | 109.42(8)  |
| O(5)#1-Cs(1)-O(10)#2 | 81.67(8)  | O(10)#6-K(1)-O(2)#5 | 57.31(7)   |
| O(9)-Cs(1)-O(8)#3    | 78.82(9)  | O(7)-K(2)-O(2)#7    | 109.38(9)  |
| O(5)#1-Cs(1)-O(8)#3  | 127.72(8) | O(7)-K(2)-O(1)#8    | 94.76(10)  |
| O(10)#2-Cs(1)-O(8)#3 | 129.28(9) | O(2)#7-K(2)-O(1)#8  | 114.33(9)  |
| O(9)-Cs(1)-O(9)#1    | 94.33(8)  | O(7)-K(2)-O(3)#9    | 122.65(10) |
| O(5)#1-Cs(1)-O(9)#1  | 82.77(8)  | O(2)#7-K(2)-O(3)#9  | 125.73(9)  |
| O(10)#2-Cs(1)-O(9)#1 | 141.33(8) | O(1)#8-K(2)-O(3)#9  | 51.11(8)   |
| O(8)#3-Cs(1)-O(9)#1  | 87.71(8)  | O(7)-K(2)-O(6)#10   | 142.60(10) |
| O(9)-Cs(1)-O(4)#3    | 78.05(8)  | O(2)#7-K(2)-O(6)#10 | 62.40(8)   |
| O(5)#1-Cs(1)-O(4)#3  | 122.71(8) | O(1)#8-K(2)-O(6)#10 | 122.29(9)  |
| O(10)#2-Cs(1)-O(4)#3 | 83.34(8)  | O(3)#9-K(2)-O(6)#10 | 82.87(8)   |
| O(8)#3-Cs(1)-O(4)#3  | 46.57(8)  | O(7)-K(2)-O(1)#7    | 65.88(8)   |
| O(9)#1-Cs(1)-O(4)#3  | 134.27(8) | O(2)#7-K(2)-O(1)#7  | 49.65(7)   |
| O(9)-Cs(1)-O(2)#3    | 106.56(8) | O(1)#8-K(2)-O(1)#7  | 94.97(8)   |
| O(5)#1-Cs(1)-O(2)#3  | 84.38(7)  | O(3)#9-K(2)-O(1)#7  | 143.43(9)  |
| O(10)#2-Cs(1)-O(2)#3 | 56.35(7)  | O(6)#10-K(2)-O(1)#7 | 111.40(8)  |
| O(8)#3-Cs(1)-O(2)#3  | 83.53(8)  | O(7)-K(2)-O(5)#10   | 104.18(9)  |
| O(9)#1-Cs(1)-O(2)#3  | 155.22(7) | O(2)#7-K(2)-O(5)#10 | 97.86(8)   |
| O(4)#3-Cs(1)-O(2)#3  | 42.67(7)  | O(1)#8-K(2)-O(5)#10 | 134.54(8)  |
| O(9)-Cs(1)-O(6)#1    | 127.70(8) | O(3)#9-K(2)-O(5)#10 | 84.33(8)   |

|                      |            |                      |            |
|----------------------|------------|----------------------|------------|
| O(5)#1-Cs(1)-O(6)#1  | 42.04(7)   | O(6)#10-K(2)-O(5)#10 | 47.03(8)   |
| O(10)#2-Cs(1)-O(6)#1 | 43.61(7)   | O(1)#7-K(2)-O(5)#10  | 130.47(8)  |
| O(8)#3-Cs(1)-O(6)#1  | 131.11(8)  | O(7)-K(2)-O(3)       | 47.88(8)   |
| O(9)#1-Cs(1)-O(6)#1  | 123.46(7)  | O(2)#7-K(2)-O(3)     | 137.57(9)  |
| O(4)#3-Cs(1)-O(6)#1  | 94.46(7)   | O(1)#8-K(2)-O(3)     | 104.05(8)  |
| O(2)#3-Cs(1)-O(6)#1  | 51.89(7)   | O(3)#9-K(2)-O(3)     | 92.13(8)   |
| O(9)-Cs(1)-O(4)#1    | 122.95(8)  | O(6)#10-K(2)-O(3)    | 111.29(9)  |
| O(5)#1-Cs(1)-O(4)#1  | 42.09(7)   | O(1)#7-K(2)-O(3)     | 111.70(8)  |
| O(10)#2-Cs(1)-O(4)#1 | 106.76(8)  | O(5)#10-K(2)-O(3)    | 64.26(8)   |
| O(8)#3-Cs(1)-O(4)#1  | 122.64(8)  | O(7)-K(2)-O(6)#11    | 139.35(10) |
| O(9)#1-Cs(1)-O(4)#1  | 43.41(7)   | O(2)#7-K(2)-O(6)#11  | 85.94(8)   |
| O(4)#3-Cs(1)-O(4)#1  | 156.86(9)  | O(1)#8-K(2)-O(6)#11  | 45.51(7)   |
| O(2)#3-Cs(1)-O(4)#1  | 126.39(7)  | O(3)#9-K(2)-O(6)#11  | 44.75(7)   |
| O(6)#1-Cs(1)-O(4)#1  | 80.24(7)   | O(6)#10-K(2)-O(6)#11 | 78.01(9)   |
| O(9)-Cs(1)-O(8)#2    | 74.69(8)   | O(1)#7-K(2)-O(6)#11  | 103.48(8)  |
| O(5)#1-Cs(1)-O(8)#2  | 79.19(8)   | O(5)#10-K(2)-O(6)#11 | 110.86(8)  |
| O(10)#2-Cs(1)-O(8)#2 | 43.01(7)   | O(3)-K(2)-O(6)#11    | 135.74(8)  |
| O(8)#3-Cs(1)-O(8)#2  | 153.01(11) | O(9)-P(1)-O(8)       | 114.35(19) |
| O(9)#1-Cs(1)-O(8)#2  | 99.26(8)   | O(9)-P(1)-O(4)       | 109.38(18) |
| O(4)#3-Cs(1)-O(8)#2  | 121.04(8)  | O(8)-P(1)-O(4)       | 111.00(18) |
| O(2)#3-Cs(1)-O(8)#2  | 99.02(7)   | O(9)-P(1)-O(10)      | 106.99(18) |
| O(6)#1-Cs(1)-O(8)#2  | 65.41(7)   | O(8)-P(1)-O(10)      | 110.08(19) |
| O(4)#1-Cs(1)-O(8)#2  | 77.38(7)   | O(4)-P(1)-O(10)      | 104.51(16) |
| O(8)-K(1)-O(4)#5     | 111.23(11) | O(6)-B(1)-O(5)       | 117.7(4)   |
| O(8)-K(1)-O(8)#4     | 87.33(11)  | O(6)-B(1)-O(7)       | 122.9(4)   |
| O(4)#5-K(1)-O(8)#4   | 104.97(10) | O(5)-B(1)-O(7)       | 119.4(4)   |
| O(8)-K(1)-O(9)#6     | 105.69(10) | O(2)-B(2)-O(3)       | 124.8(4)   |
| O(4)#5-K(1)-O(9)#6   | 139.44(10) | O(2)-B(2)-O(7)       | 120.5(3)   |
| O(8)#4-K(1)-O(9)#6   | 92.72(10)  | O(3)-B(2)-O(7)       | 114.7(4)   |
| O(8)-K(1)-O(9)#4     | 139.69(10) | O(1)-B(3)-O(6)#5     | 112.1(3)   |
| O(4)#5-K(1)-O(9)#4   | 89.23(10)  | O(1)-B(3)-O(3)#13    | 111.3(3)   |
| O(8)#4-K(1)-O(9)#4   | 53.18(9)   | O(6)#5-B(3)-O(3)#13  | 107.9(3)   |
| O(9)#6-K(1)-O(9)#4   | 72.51(11)  | O(1)-B(3)-O(10)      | 111.8(3)   |
| O(8)-K(1)-O(10)#6    | 119.88(10) | O(6)#5-B(3)-O(10)    | 108.5(3)   |
| O(4)#5-K(1)-O(10)#6  | 95.67(9)   | O(3)#13-B(3)-O(10)   | 104.9(3)   |
| O(8)#4-K(1)-O(10)#6  | 136.94(9)  | O(1)-B(4)-O(5)       | 113.3(3)   |
| O(9)#6-K(1)-O(10)#6  | 50.15(8)   | O(1)-B(4)-O(2)       | 109.5(3)   |
| O(9)#4-K(1)-O(10)#6  | 90.55(9)   | O(5)-B(4)-O(2)       | 111.0(3)   |
| O(8)-K(1)-O(2)#5     | 109.33(9)  | O(1)-B(4)-O(4)       | 110.6(3)   |
| O(4)#5-K(1)-O(2)#5   | 44.43(7)   | O(5)-B(4)-O(4)       | 106.7(3)   |
| O(8)#4-K(1)-O(2)#5   | 148.40(10) | O(2)-B(4)-O(4)       | 105.3(3)   |

Symmetry transformations used to generate equivalent atoms:

#1  $x, y-1, z$     #2  $x+1, y-1, z$     #3  $x-1, y, z$   
#4  $-x-1, -y+1, -z+1$     #5  $-x, -y+1, -z+1$     #6  $x+1, y, z$   
#7  $x, y+1, z$     #8  $-x, -y, -z+1$     #9  $x-1, y+1, z$   
#10  $-x+2, -y-1, -z$     #11  $-x+1, -y, -z$     #12  $-x+2, -y, -z$
